# Supplementary material
Source: PubMed Central journal article supplement (PMC7372908)
Supplement: NIHMS1603409-supplement-1.pdf [file NIHMS1603409-supplement-1.pdf]

**Cell Reports, Volume 31**

**Supplemental Information**

**Sex-Specific Disruption of Distinct  
mPFC Inhibitory Neurons in Spared-Nerve  
Injury Model of Neuropathic Pain**

**Andrea F. Jones and Patrick L. Sheets**

**Table S1: Comparison of PL-PVIN and PL-SOM+ male and female sham mice, Related to Figures 1 and 3**

| PVIN                             | Total                         |                                 | L2/3                         |                                | L5                            |                                |
|----------------------------------|-------------------------------|---------------------------------|------------------------------|--------------------------------|-------------------------------|--------------------------------|
|                                  | Male (n = 20 neurons; 9 mice) | Female (n = 16 neurons; 6 mice) | Male (n = 6 neurons, 6 mice) | Female (n = 8 neurons; 5 mice) | Male (n = 14 neurons, 7 mice) | Female (n = 8 neurons; 4 mice) |
| <b>Subthreshold properties</b>   |                               |                                 |                              |                                |                               |                                |
| Resting potential (mV)           | -77.15 ± 1.3                  | -74.6 ± 2                       | -77.9 ± 3.8                  | -73.6 ± 2.5                    | -76.1 ± 1.7                   | -75.5 ± 3.3                    |
| Voltage sag (%)                  | 9.4 ± 1.3                     | 7.9 ± 0.77                      | 6.9 ± 1.8                    | 6.3 ± 1.1                      | 10.2 ± 1.7                    | 9.6 ± 1.7                      |
| Input resistance (MΩ)            | 109.2 ± 7                     | 126.4 ± 8.2* <sup>§</sup>       | 120.7 ± 17.6                 | 125.7 ± 9.7                    | 102.4 ± 6.5                   | 133.9 ± 13.7** <sup>#</sup>    |
| <b>Firing properties</b>         |                               |                                 |                              |                                |                               |                                |
| Threshold (mV)                   | -35.3 ± 1.5                   | -34.65 ± 1.7                    | -31.6 ± 1.9                  | -34.1 ± 1.8                    | -36.9 ± 1.8                   | -35.2 ± 3                      |
| Threshold (pA)                   | 375 ± 21.9                    | 250 ± 25.4* <sup>§</sup>        | 400 ± 40.8                   | 275 ± 24.9 <sup>§</sup>        | 350 ± 27                      | 250 ± 46.1 <sup>§</sup>        |
| Frequency/current (Hz/pA)        | 0.59 ± .05                    | 0.62 ± .05                      | 0.70 ± .09                   | 0.54 ± 0.03                    | 0.54 ± .06                    | 0.71 ± 0.08                    |
| APs @400 pA                      | 26.5 ± 5.6                    | 52.5 ± 7.6*** <sup>#</sup>      | 12.5 ± 13                    | 43 ± 9.1 <sup>§</sup>          | 29.1 ± 6.1                    | 63.5 ± 12.4*** <sup>#</sup>    |
| Height (mV)                      | 49.4 ± 3                      | 49.5 ± 2.7                      | 38.6 ± 5.1                   | 49.1 ± 3.7                     | 54 ± 2.9                      | 49.9 ± 3.7                     |
| Slow afterhyperpolarization (mV) | -18.07 ± 1.2                  | -13.9 ± 2.3                     | -19.2 ± 1.1                  | -12.3 ± 3.3                    | -17 ± 1.6                     | -15.6 ± 3.4                    |
| SOM+                             | Total                         |                                 | L2/3                         |                                | L5                            |                                |
|                                  | Male (n = 19 neurons; 7 mice) | Female (n = 17 neurons; 8 mice) | Male (n = 8 neurons, 4 mice) | Female (n = 9 neurons, 4 mice) | Male (n = 11 neurons, 7 mice) | Female (n = 8 neurons, 4 mice) |
| <b>Subthreshold properties</b>   |                               |                                 |                              |                                |                               |                                |
| Resting potential (mV)           | -72.3 ± 1.7                   | -71.8 ± 1.7                     | -71.5 ± 5.3                  | -70.1 ± 2.5                    | -63.5 ± 1.9                   | -74.9 ± 2.3                    |
| Voltage sag (%)                  | 9.5 ± 2.1                     | 6.9 ± 1.1                       | 9.1 ± 2.8                    | 5.6 ± 1.5                      | 9.7 ± 3                       | 8.4 ± 1.5                      |
| Input resistance (MΩ)            | 236 ± 15.4                    | 224.6 ± 22.2 <sup>§</sup>       | 288.1 ± 24.5                 | 282.9 ± 36.2                   | 218.8 ± 10                    | 233.8 ± 23                     |
| <b>Firing properties</b>         |                               |                                 |                              |                                |                               |                                |
| Threshold (mV)                   | -43.4 ± 1.2                   | -40.4 ± 1.4                     | -44.9 ± 1.9                  | -41.9 ± .82                    | -42.4 ± 1.5                   | -38.7 ± 2.8                    |
| Threshold (pA)                   | 50 ± 9.2                      | 50 ± 11.2 <sup>§</sup>          | 50 ± 14.9                    | 100 ± 14.4 <sup>§</sup>        | 100 ± 11.9                    | 100 ± 18.9 <sup>§</sup>        |
| Frequency/current (Hz/pA)        | 0.38 ± .03                    | 0.34 ± .02                      | 0.36 ± .03                   | 0.31 ± .03                     | 0.39 ± .05                    | 0.38 ± .04                     |
| APs @200 pA                      | 26.5 ± 2                      | 21.6 ± 2.7                      | 28.5 ± 3.3                   | 21 ± 2.7                       | 25.1 ± 2.7                    | 23.4 ± 5.2                     |
| Height (mV)                      | 64.4 ± 2.8                    | 63.9 ± 2.7                      | 64.1 ± 4.3                   | 69.8 ± 2.5                     | 64.7 ± 3.8                    | 57.4 ± 4.1                     |
| Slow afterhyperpolarization (mV) | -7.8 ± .57                    | -10.1 ± .98                     | -7.9 ± .80                   | -8.4 ± .83                     | -9 ± 1.8                      | -12 ± 1.7                      |

#: Student's unpaired *t*-test; Data shown as mean ± standard error of the mean

§: Mann-Whitney U test; Data shown are median ± standard error of the mean

Statistical comparisons are for Sham Male vs Female; \*: *p* < 0.05; \*\*: *p* < 0.01; \*\*\*: *p* < 0.001

**Table S2: Comparison of PL-PVINS from sham and SNI male and female mice, Related to Figure 1**

| Male                             | Total                         |                              | L2/3                         |                              | L5                            |                              |
|----------------------------------|-------------------------------|------------------------------|------------------------------|------------------------------|-------------------------------|------------------------------|
|                                  | Sham (n = 20 neurons; 9 mice) | SNI (n = 18 neurons; 6 mice) | Sham (n = 6 neurons, 6 mice) | SNI (n = 7 neurons, 5 mice)  | Sham (n = 14 neurons, 7 mice) | SNI (n = 11 neurons, 5 mice) |
| <b>Subthreshold properties</b>   |                               |                              |                              |                              |                               |                              |
| Resting potential (mV)           | -77.15 ± 1.3                  | -78.3 ± 1.1                  | -77.9 ± 3.8                  | -77.9 ± 3.7                  | -76.1 ± 1.7                   | -78.7 ± 1.5                  |
| Voltage sag (%)                  | 9.4 ± 1.3                     | 6.1 ± 0.43* <sup>§</sup>     | 6.9 ± 1.8                    | 5.6 ± 0.65                   | 10.2 ± 0.57                   | 6.5 ± 1.7                    |
| Input resistance (MΩ)            | 109.2 ± 7                     | 121.3 ± 6.5 <sup>§</sup>     | 120.7 ± 17.7                 | 118.1 ± 6.8                  | 102.4 ± 6.5                   | 126.3 ± 9.8**                |
| <b>Firing properties</b>         |                               |                              |                              |                              |                               |                              |
| Threshold (mV)                   | -35.3 ± 1.5                   | -35.2 ± 0.7                  | -31.6 ± 1.9                  | -35 ± 0.8                    | -36.9 ± 1.8                   | -35.38 ± 1.1                 |
| Threshold (pA)                   | 375 ± 21.9                    | 300 ± 19.3 <sup>§</sup>      | 400 ± 40.8                   | 300 ± 28.3 <sup>§</sup>      | 300 ± 27                      | 350 ± 27 <sup>§</sup>        |
| Frequency/current (Hz/pA)        | 0.59 ± 0.05                   | 0.61 ± 0.03                  | 0.70 ± 0.09                  | 0.59 ± 0.04                  | 0.54 ± 0.06                   | 0.63 ± 0.05                  |
| APs @400 pA                      | 26.5 ± 5.6                    | 52 ± 5.2* <sup>§</sup>       | 12.5 ± 13                    | 52 ± 7.1 <sup>§</sup>        | 29.1 ± 6.1                    | 51.1 ± 7.4**                 |
| Height (mV)                      | 49.4 ± 3                      | 49.2 ± 1.7                   | 38.6 ± 5.1                   | 49.2 ± 1.6                   | 54 ± 2.9                      | 49 ± 2.7                     |
| Slow afterhyperpolarization (mV) | -18.07 ± 1.2                  | -18.26 ± 1.3 <sup>§</sup>    | -19.2 ± 1.1                  | -18.2 ± 1.7                  | -17 ± 1.6                     | -18 ± 1.8                    |
| Female                           | Total                         |                              | L2/3                         |                              | L5                            |                              |
|                                  | Sham (n = 16 neurons; 6 mice) | SNI (n = 23 neurons; 7 mice) | Sham (n = 8 neurons; 5 mice) | SNI (n = 10 neurons; 6 mice) | Sham (n = 8 neurons; 4 mice)  | SNI (n = 13 neurons; 5 mice) |
| <b>Subthreshold properties</b>   |                               |                              |                              |                              |                               |                              |
| Resting potential (mV)           | -74.6 ± 2                     | -69 ± 2                      | -73.6 ± 2.5                  | -67.7 ± 3.8                  | -75.5 ± 3.3                   | -70 ± 2.1                    |
| Voltage sag (%)                  | 7.1 ± 0.73                    | 7.1 ± 0.90                   | 6.3 ± 1.1                    | 5.1 ± 0.61                   | 10.3 ± 1.9                    | 8 ± 1.4                      |
| Input resistance (MΩ)            | 129.8 ± 8.2                   | 125.9 ± 8.9                  | 125.7 ± 9.7                  | 138.4 ± 13.8                 | 134.5 ± 13.7                  | 111.1 ± 11.4 <sup>§</sup>    |
| <b>Firing properties</b>         |                               |                              |                              |                              |                               |                              |
| Threshold (mV)                   | -34.65 ± 1.7                  | -35.56 ± .88                 | -34.1 ± 1.8                  | -34 ± 1                      | -35.2 ± 3                     | -36.8 ± 1.3                  |
| Threshold (pA)                   | 250 ± 25.4                    | 250 ± 21.2 <sup>§</sup>      | 275 ± 24.9                   | 225 ± 35.1 <sup>§</sup>      | 250 ± 46                      | 300 ± 25.7 <sup>§</sup>      |
| Frequency/current (Hz/pA)        | 0.62 ± 0.05                   | 0.61 ± 0.03                  | 0.54 ± 0.03                  | 0.62 ± 0.05                  | 0.71 ± 0.08                   | 0.61 ± 0.04                  |
| APs @400 pA                      | 52.5 ± 7.6                    | 53 ± 5.9                     | 43 ± 9.1                     | 74 ± 9 <sup>§</sup>          | 63.5 ± 12.4                   | 58 ± 7.9 <sup>§</sup>        |
| Height (mV)                      | 49.5 ± 2.7                    | 54.4 ± 2.1                   | 49.1 ± 3.7                   | 56.7 ± 3                     | 49.9 ± 3.7                    | 52.8 ± 2.8                   |
| Slow afterhyperpolarization (mV) | -13.9 ± 2.3                   | -10.1 ± 1.5                  | -12.3 ± 3.3                  | -13.5 ± 2.4                  | -15.6 ± 3.4                   | -7.8 ± 1.8**                 |

#: Student's unpaired *t*-test; Data shown as mean ± standard error of the mean

§: Mann-Whitney U test; Data shown are median ± standard error of the mean

Statistical comparisons are for Sham vs SNI; \*: *p* < 0.05; \*\*: *p* < 0.01; \*\*\*: *p* < 0.001

**Table S3: Comparison of PL-SOM+ from sham and SNI male and female mice, Related to Figure 3**

| Male                             | Total                         |                              | L2/3                         |                             | L5                            |                              |
|----------------------------------|-------------------------------|------------------------------|------------------------------|-----------------------------|-------------------------------|------------------------------|
|                                  | Sham (n = 20 neurons; 7 mice) | SNI (n = 18 neurons; 8 mice) | Sham (n = 8 neurons, 4 mice) | SNI (n = 9 neurons, 5 mice) | Sham (n = 14 neurons, 7 mice) | SNI (n = 11 neurons, 7 mice) |
| <b>Subthreshold properties</b>   |                               |                              |                              |                             |                               |                              |
| Resting potential (mV)           | -72.3 ± 1.7                   | -75.9 ± 1.7                  | -71.5 ± 5.3                  | 69.2 ± 2.6                  | -63.5 ± 1.9                   | 80.3 ± 1.7 <sup>#</sup>      |
| Voltage sag (%)                  | 6 ± 2.1                       | 6.1 ± 1.2 <sup>§</sup>       | 9.1 ± 2.8                    | 9 ± 2 <sup>§</sup>          | 9.7 ± 3                       | 5.3 ± 0.78 <sup>§</sup>      |
| Input resistance (MΩ)            | 262.5 ± 15.4                  | 218 ± 19.1                   | 288.1 ± 24.5                 | 227.4 ± 27.2                | 205.2 ± 10                    | 198.1 ± 28.2 <sup>§</sup>    |
| <b>Firing properties</b>         |                               |                              |                              |                             |                               |                              |
| Threshold (mV)                   | -43.4 ± 1.2                   | -41.1 ± 1.2                  | -44.9 ± 1.9                  | -41 ± 1.8                   | -42.4 ± 1.5                   | -41.7 ± 1.6                  |
| Threshold (pA)                   | 50 ± 9.2                      | 100 ± 28.4 <sup>*§</sup>     | 50 ± 14.9                    | 75 ± 32.7 <sup>§</sup>      | 100 ± 11.9                    | 150 ± 43.9 <sup>*§</sup>     |
| Frequency/current (Hz/pA)        | 0.38 ± 0.03                   | 0.40 ± 0.04                  | 0.36 ± 0.03                  | 0.40 ± 0.06                 | 0.39 ± 0.05                   | 0.39 ± 0.06                  |
| APs @ 200 pA                     | 26.5 ± 2.1                    | 17.7 ± 3.2                   | 28.5 ± 3.3                   | 18.8 ± 3.3                  | 25.1 ± 2.7                    | 16.6 ± 5.3                   |
| Height (mV)                      | 64.4 ± 2.8                    | 58.1 ± 3.4                   | 64.1 ± 4.3                   | 60.2 ± 4.3                  | 64.7 ± 3.8                    | 55.6 ± 5.4                   |
| Slow afterhyperpolarization (mV) | -7.8 ± .57                    | -10.7 ± 1.3 <sup>*</sup>     | -7.9 ± .80                   | -11.1 ± 2                   | -9 ± 1.8                      | -12.3 ± 1.9 <sup>§</sup>     |
| Female                           | Total                         |                              | L2/3                         |                             | L5                            |                              |
|                                  | Sham (n = 17 neurons; 8 mice) | SNI (n = 16 neurons; 7 mice) | Sham (n = 9 neurons, 4 mice) | SNI (n = 9 neurons, 4 mice) | Sham (n = 8 neurons, 4 mice)  | SNI (n = 7 neurons, 4 mice)  |
| <b>Subthreshold properties</b>   |                               |                              |                              |                             |                               |                              |
| Resting potential (mV)           | -71.8 ± 1.7                   | -73.8 ± 1.8                  | -70.1 ± 2.5                  | -71.7 ± 1.7                 | -74.9 ± 2.3                   | -81.8 ± 3.5 <sup>§</sup>     |
| Voltage sag (%)                  | 6.7 ± 1.1                     | 5.3 ± 1.8 <sup>§</sup>       | 5.1 ± 1.5                    | 5.8 ± 2.6 <sup>§</sup>      | 8.4 ± 1.5                     | 3.1 ± 2.1                    |
| Input resistance (MΩ)            | 224.6 ± 22.2                  | 209.3 ± 23.2 <sup>§</sup>    | 282.9 ± 36.2                 | 179.4 ± 23.7 <sup>**</sup>  | 213.3 ± 23                    | 212.5 ± 40 <sup>§</sup>      |
| <b>Firing properties</b>         |                               |                              |                              |                             |                               |                              |
| Threshold (mV)                   | -40.4 ± 1.4                   | -39.1 ± 2                    | -41.9 ± .82                  | -37.8 ± 3.1                 | -38.7 ± 2.8                   | -40.9 ± 2.4                  |
| Threshold (pA)                   | 100 ± 11.2                    | 100 ± 31.9 <sup>§</sup>      | 100 ± 14.4                   | 200 ± 60.6 <sup>§</sup>     | 100 ± 18.9                    | 100 ± 24.1 <sup>§</sup>      |
| Frequency/current (Hz/pA)        | 0.34 ± 0.02                   | 0.38 ± 0.03                  | 0.31 ± 0.03                  | 0.40 ± 0.03                 | 0.38 ± 0.04                   | 0.36 ± 0.04                  |
| APs @ 200 pA                     | 21.6 ± 2.7                    | 15.9 ± 3.1                   | 21 ± 2.7                     | 23 ± 4.5 <sup>§</sup>       | 23.4 ± 5.2                    | 18 ± 4.4                     |
| Height (mV)                      | 63.9 ± 2.7                    | 61.2 ± 3.2                   | 69.8 ± 2.5                   | 61.6 ± 4.8                  | 57.4 ± 4.1                    | 60.6 ± 4.4                   |
| Slow afterhyperpolarization (mV) | -10.1 ± 0.98                  | -9.7 ± 1.6                   | -8.4 ± 0.83                  | -8.9 ± 2.6                  | -12 ± 1.7                     | -10.8 ± 1.5                  |

#: Student's unpaired *t*-test; Data shown as mean ± standard error of the mean

§: Mann-Whitney U test; Data shown are median ± standard error of the mean

Statistical comparisons are for Sham vs SNI; \*: *p* < 0.05; \*\*: *p* < 0.01; \*\*\*: *p* < 0.001

**Table S4: Comparison of sEPSC from PL-PVIN and PL-SOM+ male and female mice, Related to Figures 2 and 4**

|                            | PVIN                                        |                                               | L5                                          |                                         |                                               |                                              |
|----------------------------|---------------------------------------------|-----------------------------------------------|---------------------------------------------|-----------------------------------------|-----------------------------------------------|----------------------------------------------|
|                            | Male Sham<br>(n = 12<br>neurons; 5<br>mice) | Female<br>Sham (n = 13<br>neurons; 5<br>mice) | Male Sham<br>(n = 12<br>neurons; 5<br>mice) | Male SNI (n =<br>12 neurons; 5<br>mice) | Female<br>Sham (n = 13<br>neurons; 5<br>mice) | Female SNI<br>(n = 11<br>neurons; 4<br>mice) |
| <b>Synaptic properties</b> |                                             |                                               |                                             |                                         |                                               |                                              |
| sEPSC amplitude (pA)       | 22.5 ± 1.9                                  | 19.4 ± .92                                    | 22.5 ± 1.9                                  | 19.6 ± 1.5                              | 19.4 ± .92                                    | 18 ± 1.2                                     |
| sEPSC frequency (Hz)       | 13.3 ± 1.3                                  | 30.7 ± 2.8                                    | 13.3 ± 1.3                                  | 17.1 ± 2                                | 30.7 ± 2.8                                    | 34.3 ± 3.5                                   |
|                            | SOM+                                        |                                               | L2/3                                        |                                         |                                               |                                              |
|                            | Male Sham<br>(n = 7<br>neurons; 3<br>mice)  | Female<br>Sham (n = 7<br>neurons; 4<br>mice)  | Male Sham<br>(n = 7<br>neurons; 3<br>mice)  | Male SNI (n =<br>8 neurons; 3<br>mice)  | Female<br>Sham (n = 7<br>neurons; 4<br>mice)  | Female SNI<br>(n = 7<br>neurons; 5<br>mice)  |
| <b>Synaptic properties</b> |                                             |                                               |                                             |                                         |                                               |                                              |
| sEPSC amplitude (pA)       | 21.5 ± 2.7                                  | 18.1 ± 1.2                                    | 21.5 ± 2.7                                  | 17.9 ± 1.5                              | 18.1 ± 1.2                                    | 17.5 ± 1.7                                   |
| sEPSC frequency (Hz)       | 7.2 ± 1.6                                   | 9.2 ± 1.6                                     | 7.2 ± 1.6                                   | 5.8 ± .88                               | 9.2 ± 1.6                                     | 4.3 ± 1*#                                    |

#: Student's unpaired *t*-test; Data shown as mean ± standard error of the mean

\$: Mann-Whitney U test; Data shown are median ± standard error of the mean

Statistical comparisons are for Sham Male vs Female; Male Sham vs SNI; Female Sham vs SNI;

\*:  $p < 0.05$ ; \*\*:  $p < 0.01$ ; \*\*\*:  $p < 0.001$
